# Supplementary material for: Transcriptional Modulation of the Hippo Signaling Pathway by Drugs Used to Treat Bipolar Disorder and Schizophrenia
Source: MDPI journal article supplement (doi:10.3390/ijms22137164), 2021-07-02
Supplement: s1 [file s1]

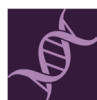

## Supplementary Materials

**Table S1.** Genes in the HIPPO, Wnt, BMP, Notch and Hedgehog signaling pathways with evidence of overall downregulation by amisulpride, aripiprazole, clozapine, quetiapine, and risperidone ( $p < 0.05$ ). These genes were used in the CMap analysis.

| Gene   | Pathway  | LogFC |      | p-value       |
|--------|----------|-------|------|---------------|
|        |          | Mean  | SEM  |               |
| APH1A  | Notch    | -0.07 | 0.02 | <b>0.022</b>  |
| BMP4   | BMP      | -0.15 | 0.07 | <b>0.043</b>  |
| CSNK1D | Wnt      | -0.09 | 0.03 | <b>0.035</b>  |
| EVC2   | Hedgehog | -0.12 | 0.04 | <b>0.034</b>  |
| FZD1   | Wnt      | -0.11 | 0.03 | <b>0.035</b>  |
| FZD2   | Wnt      | -0.40 | 0.07 | <b>0.0050</b> |
| FZD4   | Wnt      | -0.13 | 0.03 | <b>0.013</b>  |
| FZD8   | Wnt      | -0.22 | 0.04 | <b>0.0060</b> |
| GLI3   | Hedgehog | -0.09 | 0.03 | <b>0.031</b>  |
| LFNG   | Notch    | -0.44 | 0.12 | <b>0.023</b>  |
| NCSTN  | Notch    | -0.14 | 0.02 | <b>0.0020</b> |
| NF2    | HIPPO    | -0.11 | 0.04 | <b>0.032</b>  |
| SMAD3  | HIPPO    | -0.07 | 0.02 | <b>0.034</b>  |
| SMO    | Hedgehog | -0.13 | 0.02 | <b>0.0050</b> |
| TCF7L1 | HIPPO    | -0.19 | 0.04 | <b>0.011</b>  |
| TEAD2  | HIPPO    | -0.15 | 0.04 | <b>0.016</b>  |
| TEAD3  | HIPPO    | -0.14 | 0.03 | <b>0.0060</b> |
| WNT3   | Wnt      | -0.15 | 0.02 | <b>0.0010</b> |
| WNT5B  | Wnt      | -0.19 | 0.04 | <b>0.0070</b> |
| WNT7A  | Wnt      | -0.23 | 0.05 | <b>0.013</b>  |
| WNT9A  | Wnt      | -0.23 | 0.07 | <b>0.030</b>  |
| WWC1   | HIPPO    | -0.17 | 0.03 | <b>0.0040</b> |
